# Supplementary material
Source: PubMed Central journal article supplement (PMC4120943)
Supplement: NIHMS548288-supplement-01.pdf [file NIHMS548288-supplement-01.pdf]

**Appendix 1 / Supplemental information. Comprehensibility Ratings and overview of item selection of the Pediatric SWB item bank.**

|                                                           | Comprehensibility Ratings |            |             | Comprehension * | Exclusion † |
|-----------------------------------------------------------|---------------------------|------------|-------------|-----------------|-------------|
|                                                           | All ages M                | Age 8-11 M | Age 12-18 M |                 |             |
| <b>LIFE SATISFACTION</b>                                  |                           |            |             |                 |             |
| <b>Thinking about the past 4 weeks...</b>                 |                           |            |             |                 |             |
| my life was perfect.                                      | 3.0                       | 3.0        | 3.0         |                 |             |
| my life was ideal.                                        | 2.2                       | 1.5        | 2.7         | A               |             |
| my life was the best.                                     | 3.0                       | 3.0        | 3.0         |                 |             |
| my life was outstanding.                                  | 2.8                       | 2.5        | 3.0         |                 |             |
| my life was excellent.                                    | 3.0                       | 3.0        | 3.0         |                 |             |
| my life was great.                                        | 3.0                       | 3.0        | 3.0         |                 |             |
| my life was very good.                                    | 3.0                       | 3.0        | 3.0         |                 |             |
| my life was good.                                         | 3.0                       | 3.0        | 3.0         |                 |             |
| my life was going very well.                              | 3.0                       | 3.0        | 3.0         |                 |             |
| my life was bad.                                          | 3.0                       | 3.0        | 3.0         |                 |             |
| my life was just right.                                   | 2.4                       | 1.5        | 3.0         | A               |             |
| my life was terrible.                                     | 3.0                       | 3.0        | 3.0         |                 | TR          |
| my life was horrible.                                     | 2.8                       | 2.5        | 3.0         |                 | TR          |
| my life was the worst.                                    | 3.0                       | 3.0        | 3.0         |                 | TR          |
| the conditions of my life were excellent.                 | 2.4                       | 2.7        | 2.0         |                 |             |
| my life was excellent.                                    | 2.8                       | 3.0        | 2.7         |                 |             |
| I was satisfied with my life situation.                   | 3.0                       | 3.0        | 3.0         |                 |             |
| I was happy with the way things were.                     | 2.6                       | 2.0        | 3.0         |                 |             |
| I had what I wanted in life.                              | 3.0                       | 3.0        | 3.0         |                 |             |
| I had what I needed in life.                              | 2.2                       | 1.5        | 2.7         | A               |             |
| I got the important things in life.                       | 1.8                       | 1.7        | 2.0         |                 | CI          |
| I got the things I wanted in life.                        | 3.0                       | 3.0        | 3.0         |                 |             |
| I wanted to change things in my life.                     | 3.0                       | 3.0        | 3.0         |                 |             |
| I wanted a better life.                                   | 3.0                       | 3.0        | 3.0         |                 |             |
| I wanted a different life.                                | 3.0                       | 3.0        | 3.0         |                 |             |
| my life situation was terrible.                           | 3.0                       | 3.0        | 3.0         |                 | TR          |
| the conditions of my life were terrible.                  | 2.6                       | 2.0        | 3.0         | A               | TR          |
| my life was better than most kids' lives.                 | 2.8                       | 2.7        | 3.0         |                 |             |
| I enjoyed my life more than most kids enjoyed their lives | 2.6                       | 3.0        | 2.0         | C               |             |
| I lived as well as other kids.                            | 2.8                       | 3.0        | 2.7         |                 |             |
| my life was as good as most kids.                         | 3.0                       | 3.0        | 3.0         |                 |             |
| my life was worse than most kids' lives.                  | 3.0                       | 3.0        | 3.0         |                 | TR          |

|                                               |            |            |            |   |    |
|-----------------------------------------------|------------|------------|------------|---|----|
| I was happy with my personal life.            | 2.8        | 2.5        | 3.0        |   |    |
| I was happy with my friendships.              | 3.0        | 3.0        | 3.0        |   |    |
| I was satisfied with the friends I have.      | 3.0        | 3.0        | 3.0        |   |    |
| I was happy with my social life.              | 2.0        | 2.0        | 2.0        |   |    |
| I was happy with my family life.              | 3.0        | 3.0        | 3.0        |   |    |
| I was happy with my life at school.           | 3.0        | 3.0        | 3.0        |   |    |
| I was happy with my life at home.             | 3.0        | 3.0        | 3.0        |   |    |
| I was happy with my life in my neighborhood.  | 2.8        | 2.5        | 3.0        |   |    |
| I was happy with my life in my community.     | 2.6        | 2.0        | 3.0        | A |    |
| I was satisfied with my free time activities. | 3.0        | 3.0        | 3.0        |   |    |
| I was satisfied with my skills and talents.   | 2.8        | 3.0        | 2.5        |   |    |
| I wanted to live in a different place.        | 2.8        | 3.0        | 2.7        |   |    |
| I was satisfied with my life.                 | 3.0        | 3.0        | 3.0        |   |    |
| I felt extremely positive about my life.      | 3.0        | 3.0        | 3.0        |   |    |
| I was happy with my life.                     | 3.0        | 3.0        | 3.0        |   |    |
| I felt very good about my life.               | 2.8        | 2.5        | 3.0        |   |    |
| I felt good about my life.                    | 3.0        | 3.0        | 3.0        |   |    |
| I had a good life.                            | 3.0        | 3.0        | 3.0        |   |    |
| I felt positive about my life.                | 3.0        | 3.0        | 3.0        |   |    |
| I had fun.                                    | 3.0        | 3.0        | 3.0        |   |    |
| I had a lot of fun.                           | 3.0        | 3.0        | 3.0        |   |    |
| I enjoyed my life.                            | 3.0        | 3.0        | 3.0        |   |    |
| I liked the way I lived my life.              | 3.0        | 3.0        | 3.0        |   |    |
| my life was worthwhile.                       | 2.2        | 1.7        | 3.0        | A | TR |
| I was pleased to be alive.                    | 3.0        | 3.0        | 3.0        |   |    |
| my life went well.                            | 3.0        | 3.0        | 3.0        |   |    |
| I was unhappy with my life.                   | 3.0        | 3.0        | 3.0        |   |    |
| I felt bad about my life.                     | 3.0        | 3.0        | 3.0        |   |    |
| I felt really bad about my life.              | 3.0        | 3.0        | 3.0        |   |    |
| I hated my life.                              | 3.0        | 3.0        | 3.0        |   |    |
| I lived my life well.                         | 3.0        | 3.0        | 3.0        |   |    |
| I was satisfied with my life.                 | 2.8        | 2.8        | 3.0        |   |    |
| <b>Average comprehension of LS</b>            | <b>2.9</b> | <b>2.8</b> | <b>2.9</b> |   |    |

## POSITIVE AFFECT

### In the past 7 days...

|                   |      |      |      |   |    |
|-------------------|------|------|------|---|----|
| I felt calm.      | 2.40 | 2.00 | 2.67 |   |    |
| I felt very calm. | 3.00 | 3.00 | 3.00 |   |    |
| I felt at ease.   | 1.40 | 1.00 | 2.00 | A | CI |
| I felt peaceful.  | 3.00 | 3.00 | 3.00 |   |    |
| I felt satisfied. | 3.00 | 3.00 | 3.00 |   |    |
| I felt content.   | 1.80 | 1.00 | 2.33 | A |    |
| I felt grateful.  | 2.60 | 2.00 | 3.00 | A |    |

|                                   |      |      |      |   |    |
|-----------------------------------|------|------|------|---|----|
| I felt thankful.                  | 3.00 | 3.00 | 3.00 |   |    |
| I felt positive.                  | 2.60 | 2.33 | 3.00 |   |    |
| I felt very positive.             | 3.00 | 3.00 | 3.00 |   |    |
| I felt carefree.                  | 3.00 | 3.00 | 3.00 |   |    |
| I felt relaxed.                   | 3.00 | 3.00 | 3.00 |   |    |
| I felt very relaxed.              | 3.00 | 3.00 | 3.00 |   |    |
| I felt comfortable.               | 3.00 | 3.00 | 3.00 |   |    |
| I felt fulfilled.                 | 2.20 | 2.00 | 2.33 |   |    |
| I felt friendly.                  | 3.00 | 3.00 | 3.00 |   |    |
| I felt affectionate.              | 1.40 | 1.00 | 2.00 | A | CI |
| I felt loved by my parents.       | 3.00 | 3.00 | 3.00 |   |    |
| I felt loved.                     | 3.00 | 3.00 | 3.00 |   |    |
| I felt respected.                 | 2.40 | 2.00 | 2.67 |   |    |
| I felt appreciated.               | 3.00 | 3.00 | 3.00 |   |    |
| I felt proud.                     | 2.80 | 2.50 | 3.00 |   |    |
| I had much to be proud about.     | 3.00 | 3.00 | 3.00 |   |    |
| I felt pleased.                   | 3.00 | 3.00 | 3.00 |   |    |
| I felt great.                     | 2.80 | 3.00 | 2.67 |   |    |
| I felt cheerful.                  | 3.00 | 3.00 | 3.00 |   |    |
| I felt happy.                     | 3.00 | 3.00 | 3.00 |   |    |
| I had very strong happy feelings. | 2.75 | 2.50 | 3.00 |   |    |
| I felt joyful.                    | 3.00 | 3.00 | 3.00 |   |    |
| I felt delighted.                 | 2.60 | 2.33 | 3.00 |   |    |
| I enjoyed the things I did.       | 3.00 | 3.00 | 3.00 |   |    |
| my life was pleasurable.          | 3.00 | 3.00 | 3.00 |   |    |
| I smiled a lot.                   | 3.00 | 3.00 | 3.00 |   |    |
| I laughed a lot.                  | 3.00 | 3.00 | 3.00 |   |    |
| I felt amused.                    | 2.75 | 2.50 | 3.00 |   |    |
| I was merry.                      | 2.20 | 1.00 | 3.00 | A |    |
| I was in a good mood.             | 3.00 | 3.00 | 3.00 |   |    |
| I was in good spirits.            | 2.40 | 2.67 | 2.00 |   |    |
| I felt good.                      | 2.80 | 2.50 | 3.00 |   |    |
| I felt blissful.                  | 2.20 | 1.67 | 3.00 | A |    |
| I felt ecstatic.                  | 2.00 | 1.00 | 2.67 | A | CI |
| I felt enthusiastic.              | 2.40 | 1.50 | 3.00 | A |    |
| I felt very enthusiastic.         | 2.00 | 1.00 | 2.67 | A |    |
| I felt energetic.                 | 3.00 | 3.00 | 3.00 |   |    |
| I had a lot of energy.            | 2.80 | 3.00 | 2.50 |   |    |
| I felt full of energy.            | 3.00 | 3.00 | 3.00 |   |    |
| I felt wide awake.                | 2.80 | 2.67 | 3.00 |   |    |
| I felt attentive.                 | 1.60 | 1.00 | 2.00 | A | CI |
| I felt refreshed.                 | 3.00 | 3.00 | 3.00 |   |    |
| I felt active.                    | 2.60 | 2.00 | 3.00 | A |    |
| I felt very active.               | 3.00 | 3.00 | 3.00 |   |    |
| I felt lively.                    | 2.20 | 2.67 | 1.50 | C | CI |

|                                    |             |             |             |   |
|------------------------------------|-------------|-------------|-------------|---|
| I felt alert.                      | 3.00        | 3.00        | 3.00        |   |
| I felt full of pep.                | 2.40        | 1.50        | 3.00        | A |
| I felt strong.                     | 2.40        | 2.00        | 2.67        |   |
| I felt very strong.                | 2.80        | 2.50        | 3.00        |   |
| I felt healthy.                    | 2.80        | 3.00        | 2.67        |   |
| I felt very healthy.               | 3.00        | 3.00        | 3.00        |   |
| <b>Average comprehension of PA</b> | <b>2.69</b> | <b>2.51</b> | <b>2.83</b> |   |

## MEANING & PURPOSE

### Thinking about your life,...

indicate how much each statement is like you:

|                                                                                |      |      |      |    |
|--------------------------------------------------------------------------------|------|------|------|----|
| I expect good things to happen to me.                                          | 2.80 | 2.67 | 3.00 |    |
| I expect amazing things to happen to me.                                       | 3.00 | 3.00 | 3.00 |    |
| I am optimistic.                                                               | 2.60 | 2.33 | 3.00 |    |
| I am optimistic about my future.                                               | 2.00 | 1.50 | 2.33 | A  |
| I expect things to work out for the best.                                      | 2.60 | 2.00 | 3.00 | A  |
| I expect things to go the way I want them to.                                  | 2.20 | 1.00 | 3.00 | A  |
| I expect to have a job in the future.                                          | 3.00 | 3.00 | 3.00 |    |
| I expect to have a family in the future.                                       | 2.80 | 2.67 | 3.00 |    |
| I expect to be successful in the future.                                       | 3.00 | 3.00 | 3.00 |    |
| I expect to enjoy my future life.                                              | 3.00 | 3.00 | 3.00 |    |
| I expect to have a long life.                                                  | 3.00 | 3.00 | 3.00 |    |
| I expect to have success in the future.                                        | 2.80 | 2.50 | 3.00 |    |
| I expect to achieve what I want in life.                                       | 3.00 | 3.00 | 3.00 |    |
| I look forward to doing fun things.                                            | 3.00 | 3.00 | 3.00 |    |
| I look forward to what will happen in the future.                              | 3.00 | 3.00 | 3.00 |    |
| I expect to succeed at what I try to do.                                       | 3.00 | 3.00 | 3.00 |    |
| When bad things happen, I expect them to get better.                           | 2.80 | 2.67 | 3.00 |    |
| When I wake up, I think about the good things that will happen during the day. | 3.00 | 3.00 | 3.00 | CI |
| I expect the best to happen to me.                                             | 3.00 | 3.00 | 3.00 |    |
| I have hope.                                                                   | 2.60 | 2.00 | 3.00 | A  |
| I am full of hope.                                                             | 3.00 | 3.00 | 3.00 |    |
| I always have hope.                                                            | 2.80 | 2.67 | 3.00 |    |
| I feel hopeful about my plans for the future.                                  | 3.00 | 3.00 | 3.00 |    |
| I feel hopeful about my future.                                                | 2.60 | 2.33 | 3.00 |    |
| I am positive about my future.                                                 | 2.80 | 2.50 | 3.00 |    |
| I can do almost anything if I have enough faith in myself.                     | 3.00 | 3.00 | 3.00 |    |
| I set goals for my future.                                                     | 2.60 | 2.33 | 3.00 |    |
| I have goals for my future.                                                    | 2.60 | 2.00 | 3.00 |    |
| I have plans to carry out.                                                     | 2.60 | 2.33 | 3.00 |    |

|                                                                |             |             |             |    |
|----------------------------------------------------------------|-------------|-------------|-------------|----|
| I have goals for myself.                                       | 3.00        | 3.00        | 3.00        |    |
| I have long-term goals for myself.                             | 3.00        | 3.00        | 3.00        |    |
| I have plans for my future.                                    | 3.00        | 3.00        | 3.00        |    |
| I have things I want to do in life.                            | 3.00        | 3.00        | 3.00        |    |
| I have things I want to do in life.                            | 3.00        | 3.00        | 3.00        |    |
| I have things I want to accomplish in life.                    | 2.60        | 2.00        | 3.00        | A  |
| The things I have done in the past will help me in the future. | 2.60        | 2.33        | 3.00        |    |
| I expect to achieve my goals.                                  | 3.00        | 3.00        | 3.00        |    |
| I know where I am going in life.                               | 3.00        | 3.00        | 3.00        |    |
| I can reach my goals in life.                                  | 3.00        | 3.00        | 3.00        |    |
| I want to make the most out of my life.                        | 2.80        | 2.50        | 3.00        |    |
| My life is filled with important things.                       | 2.80        | 2.50        | 3.00        |    |
| My life is important.                                          | 2.60        | 2.00        | 3.00        | A  |
| I want to do what is important.                                | 3.00        | 3.00        | 3.00        |    |
| I try to find meaning in life.                                 | 2.60        | 3.00        | 2.00        |    |
| My life has meaning.                                           | 3.00        | 3.00        | 3.00        |    |
| My life is filled with meaning.                                | 2.60        | 2.33        | 3.00        |    |
| I try to find purpose in life.                                 | 2.40        | 2.00        | 2.67        |    |
| My life has purpose.                                           | 3.00        | 3.00        | 3.00        |    |
| My life is filled with purpose.                                | 2.40        | 1.50        | 3.00        | A  |
| I have a clear purpose in life.                                | 2.20        | 1.67        | 3.00        | A  |
| I know what makes my life meaningful.                          | 2.20        | 2.33        | 2.00        |    |
| My life is filled with things that interest me.                | 3.00        | 3.00        | 3.00        |    |
| I have a reason for living.                                    | 2.60        | 2.33        | 3.00        |    |
| I am satisfied with my purpose in life.                        | 2.40        | 2.00        | 2.67        | TR |
| People will remember me when I die.                            | 3.00        | 3.00        | 3.00        |    |
| I have a goal for my future.                                   | 3.00        | 3.00        | 3.00        |    |
| I have a long-term goal for myself.                            | 3.00        | 3.00        | 3.00        |    |
| <b>Average comprehension of MP</b>                             | <b>2.79</b> | <b>2.61</b> | <b>2.94</b> |    |

\* Comprehension: A: Item better understood by adolescents, C: Item better understood by children (Difference in comprehension rating > 1);

† Exclusion of items: as a result of CI=cognitive interview or TR= translatability review.

## Appendix 2 / Supplemental Information. References of the authors of the instruments included in the Item Bank Development (see table 2).

- Aspinwall LG. Modeling cognitive adaptation: A longitudinal investigation of the impact of individual differences and coping on college adjustment and performance. *Journal of Personality and Social Psychology* 1992; 63(6):989-1003.
- Astedt-Kurki P. Health, well-being and nursing as experienced by municipal residents and nurses. Academic Dissertation. *Acta Universitatis Tamperensis, Tampere, Ser A.* 1992; 349.
- Bachman JG. The monitoring the future project after 22 years: Design and procedures. *Monitoring the Future Occasional Paper* 38. 1996; Institute for Social Research in Ann Arbor, Michigan.
- Barbaranelli C. A questionnaire for measuring the big five in late childhood. *Pers Individ Differ* 2003; 34: 645.
- Benson, Beyond the 'village' rhetoric: Creating healthy communities for children and adolescents., *Applied Developmental Science* 1998; 2:138.
- Bevans KB, Riley AW, Forrest CB. Development of the Healthy Pathways Parent-Report Scales. *Qual Life Res.* 2012 Dec;21(10):1755-70.
- Bhatia S. The Minneapolis-Manchester Quality of Life instrument: reliability and validity of the Adolescent Form, *Journal of Clinical Oncology* 2002; 20(24):4692-4698.
- Bush SF. The Future Expectations Inventory., Master of Arts in Psychology thesis, Yeshiva University, New York., 1995.
- Columbo, General well-being in adolescents: Its nature and measurement. (Doctoral dissertation, St. Louis University, 1984)., *Dissertation Abstracts International* 1986; 46:2246B.
- Cummins RA. *Comprehensive Quality of Life Scale – Student (Grade 7 – 12): COMQOL-S-S5.* 5th ed., Melbourne: School of Psychology, Deakin University, 1997.
- Dember WN. The measurement of optimism and pessimism, *Current Psychology: Research and Reviews* 1989; 8:102.
- Diener E. The Satisfaction with Life Scale. *Journal of Personality Assessment.* 1985; 68:653-663.
- Epstein JL. Administration and technical manual: The Quality of School Life Scale. Boston: Houghton-Mifflin. 1978.
- Ey, Sydney. A new measure of children's optimism and pessimism: the youth life orientation test. *Journal of Child Psychology & Psychiatry & Allied Disciplines* 2005; 46(5):548-558.
- Gilligan TD. Initial development and validation of the Multidimensional Students' Life Satisfaction Scale-Adolescent Version. *Applied Research in Quality of Life* 2007; 2:1.
- Goetz T. A hierarchical conceptualization of enjoyment in students. *Learning and Instruction* 2006; 16:323.
- Gong GW. The Quality of My Life questionnaire: the minimal clinically important difference for pediatric rheumatology patients. *Journal of Rheumatology* 2007; 34:581.
- Goodman R. The Strengths and Difficulties Questionnaire: A research note. *Journal of Child, Psychology and Psychiatry* 1997; 38:581.
- Gottschalk L A. A Hope Scale applicable to verbal samples. *Archives of General Psychiatry* 1974; 30:779.
- Grob A. Adolescents' perceived control: Domain specificity, expectancy, and appraisal. *Journal of Adolescence* 1995; 18:403.
- Henrich G. Questions on Life Satisfaction (FLZM) — A Short Questionnaire for Assessing Subjective Quality of Life. *European Journal of Social Psychology* 2007; 16:150.
- Huebner ES. Initial development of the Students' Life Satisfaction Scale. *School Psychology International*, 1991; 12:231-240.
- Huebner ES. Preliminary development and validation of a multidimensional life satisfaction scale for children. *Psychological Assessment* 1994; 6:149-158.
- Ivens J. The development of a happiness measure for schoolchildren. *Educational Psychology in Practice* 2007; 23:221.
- Kahneman D. A survey method for characterizing daily life experience: The day reconstruction method. *Science* 2004; 306(5702):1776-1780.
- Kelley T. Thought recognition, locus of control, and adolescent well-being. *Adolescence* 2000; 35(139):531-550.
- Landgraf JM. *The CHQ User's Manual.* 1st ed. Boston, MA: The Health Institute, New England Medical Centre, 1996.
- Langeveld JH. A quality of life instrument for adolescents with chronic headache. *Cephalgia* 1996; 16(3):183-196.
- Laurent JA. A measure of positive and negative affect for children: Scale development and preliminary validation, *Psychological Assessment* 1999; 11:326.
- Lorr M. *The Profile of Mood States manual.* San Francisco, CA: Educational and Institutional Testing Service 1971.
- Lyubomirsky S, Lepper HS. A measure of subjective happiness: Preliminary reliability and construct validation. *Social Indicators Research* 1999; 46:137-155.
- MacDonald PM. Schematic drawings of facial expressions for emotion recognition and interpretation by preschool-aged children. *Genetic, Social, and General Psychology Monographs* 1996; 122 (4):373-388.

Massey EK. Self-generated goals and goal process appraisals: Relationships with sociodemographic factors and well-being. *Journal of adolescence* 2009; 32 (3):501-518.

McLeod JD. Psychological well-being in the early life course: Variations by socioeconomic status, gender, and race/ethnicity. *Social psychology quarterly* 2004; 67:257.

Miller JF. Development of an instrument to measure hope. *Nursing Research* 1988; 37:6-10.

Moos RH. Revised health and daily living form manual., Palo Alto, CA: Veterans Administration and Stanford University Medical Centers 1987.

Nurmi JE. Adolescent development in an age-graded context: the role of personal beliefs, goals, and strategies in the tackling of developmental tasks and standards. *International Journal of Behavioral Development* 1993; 16:169.

Osman A. The Reasons for Living Inventory for Adolescents (RFL-A): development and psychometric properties. *Journal of clinical psychology* 1998; 54 (8):1063-1078.

Otley A. The IMPACT questionnaire: a valid measure of health-related quality of life in pediatric inflammatory bowel disease. *J Pediatr Gastroenterol Nutr* 2002; 35:557-563.

Park N. Moral competence and character strengths among adolescents: the development and validation of the Values in Action Inventory of Strengths for Youth. *Journal of adolescence* 2006; 29 (6):891-909.

Patrick, D.L. Adolescent quality of life, Part II: Initial validation of a new instrument. *Journal of Adolescence* 2002, 25: 287-300.

Phillips E. "What makes you feel?": Children's perceptions of the antecedents of emotion, *Journal of Social Behavior & Personality* 1986; 1:587.

Ravens-Sieberer U. KIDSCREEN-52 quality-of-life measure for children and adolescents. *Expert Review of Pharmacoeconomics Outcomes Research* 2005; 5:353-364.

Riley AW. Technical Manual for the Child Health and Illness Profile-Child Edition (CHIP-CETMP) Parent and Child Report Forms, 1.0 ed. Baltimore: Johns Hopkins University 2001.

Robert DA. Predicting children's quality of life in a clinical trial: what do children's reports tell us? *J of Ped Psych*. 2001; 139:854-861.

Robitschek C. Personal growth initiative: The construct and its measure. *Measurement and Evaluation in Counseling and Development* 1998; 30 (4):183-189.

Ronen GM, Streiner DL, Rosenbaum P; Canadian Pediatric Epilepsy Network. Health-related quality of life in children with epilepsy: development and validation of self-report and parent proxy measures. *Epilepsia*. 2003 Apr;44(4):598-612.

Ruch W, Köhler G, Thriel VC. Assessing the "humorous temperament": Construction of the facet and standard trait forms of the State-Trait-Cheerfulness-Inventory – STCI. *Humor - International Journal of Humor Research* 2009; 9:303-340.

Scheier MF, Carver CS. Optimism, coping, and health: assessment and implications of generalized outcome expectancies *Health Psychology* 1985; 4 (3):219-247.

Scheier MF et al. Distinguishing optimism from neuroticism (and trait anxiety, self-mastery, and self-esteem): A Reevaluation of the Life Orientation Test. *Journal of Personality and Social Psychology* 1994; 67(6):1063–1078.

Skevington SM. The World Health Organization's WHOQOL-BREF quality of life assessment: Psychometric properties and results of the international field trial. A Report from the WHOQOL Group, *Quality of Life Research: An International Journal of Quality of Life Aspects of Treatment, Care & Rehabilitation* 2004; 13 (3):299-310.

Snyder CR. The development and validation of the Children's Hope Scale. *Journal of pediatric psychology* 1997; 22:399-421.

Starfield B. The Adolescent Child Health and Illness Profile: A Population Based Measure of Health. *Medical Care* 1995; 33:553-566.

Steger MF, Frazier P, Oishi S & Kaler M. The Meaning in Life Questionnaire: Assessing the presence of and search for meaning in life. *Journal of Counseling Psychology* 2006; 53:80-93.

Varni JW. PedsQL 4.0™: Reliability and validity of the Pediatric Quality of Life Inventory™ version 4.0 Generic Core Scales in healthy and patient populations. *Med Care* 2001; 39(8):800-812.

Walden TA. How I feel: A self-report measure of emotional arousal and regulation. *Psychol Assess* 2003; 15, 399.

Warr PB. Scales for the measurement of some work attitudes and aspects of psychological well-being. *Journal of Occupational Psychology* 1979; 52:129-148.

Watson D, Clark LA. The PANAS-X: Preliminary manual for the Positive and Negative Affect Schedule-Expanded Form, Dallas, TX: Author. 1991.

Weinert C. Evaluation of the Personal Resource Questionnaire: a social support measure. *Birth Defect Orig Artic Ser* 1984; 20 (5): 59-97.

Weinert C, Brandt PA. The PRQ — A social support system. *Nursing Research* 1981; 30:277-280.

Weist MD, Albus KA, Bickham N, Tashman NA, Perez-Febles A. A questionnaire to measure factors that protect youth against stressors of inner-city life. *Psychiatr Serv*. 2000 Aug;51(8):1042-4.

Wiklund I. A new self assessment questionnaire to measure well-being in children, particularly those of short stature. *Quality of Life Research* 1994; 3(6):449-455.

Wildrick D. Quality of life in children with well-controlled epilepsy. *J Neurosc Nurs* 1996; 28(3):192-198.
